# Supplementary material for: An Overlooked Hepcidin-cadmium Connection
Source: Preprints.org preprint supplement (doi:10.20944/preprints202210.0457.v1), 2022-10-28
Supplement: Supplementary file 3 [file supplementary]

SUPPORTING INFORMATION

An overlooked hepcidin-cadmium connection

Dawid Płonka 1, Marta D. Wiśniewska 1, Manuel D. Peris-Díaz 2, Artur Krężel 2, Arkadiusz M. Bonna 3 and Wojciech Bal 1*

1 Institute of Biochemistry and Biophysics, Polish Academy of Sciences, Pawińskiego 5a, 02‑106 Warsaw, Poland; d.plonka@ibb.waw.pl (D.P.); m.wisniewska@ibb.waw.pl (M.D.W.)

2 Department of Chemical Biology, Faculty of Biotechnology, University of Wrocław,

Joliot-Curie 14a, 50-383 Wrocław, Poland; manuel.perisdiaz@uwr.edu.pl (M.P.); artur.krezel@uwr.edu.pl (A.K.)

3

* Correspondence: wbal@ibb.waw.pl

# Supporting figures

**Scheme 1.** Comparison of sequences of hepcidin-25 and α-domain of human metallothionein 2 (Cys residues set in bold).

**MT2** KS**CC**S**CC**PVG**C**AK**C**AQG**C**I**C**KGASDK**C**S**CC**A

**hepcidin-25** DTHFPI**C**IF**CC**G**CC**HRSK**C**GM**CC**KT

**Figure S1.** 100 μM 5R-hepcidin in 100mM HEPES pH 7.4, titrated with Cd(NO3)2 (top) and Zn(NO3)2 (bottom). Cd(II) and Zn(II) to peptide ratios are color coded on the plots.


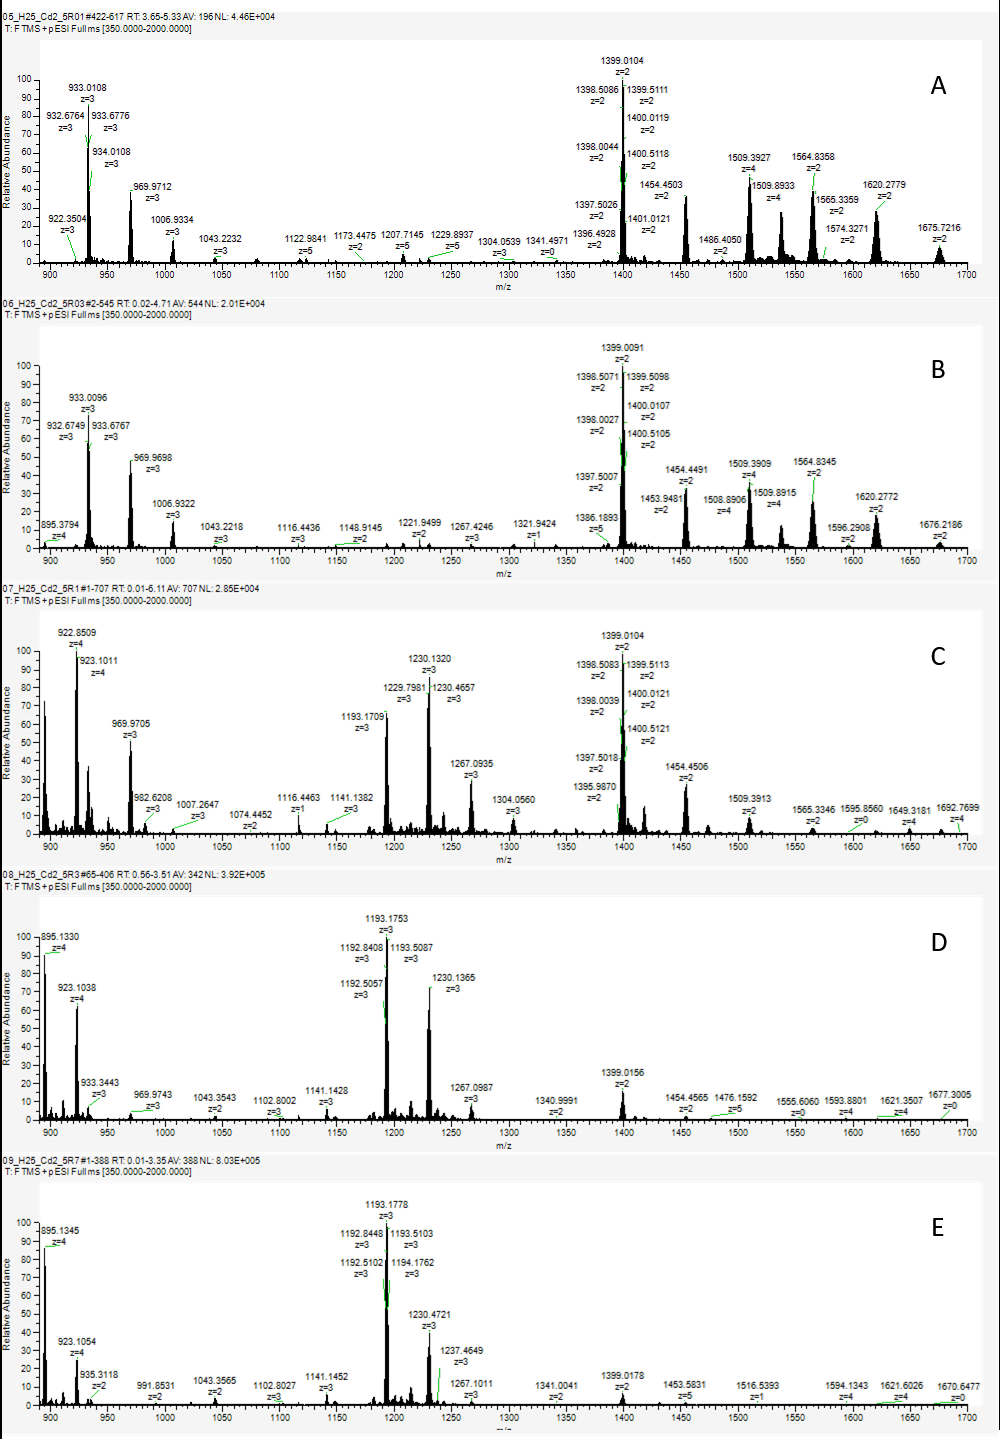


**Figure S2.** Native mass spectra of 10 μM Hepcidin-25 with 20 μM Cd(II) acetate with varying concentration of 5R-hepcidin: A) 1 μM, B) 3 μM, C) 10 μM, D) 30 μM, E) 70 μM in ammonium acetate pH 7.4.


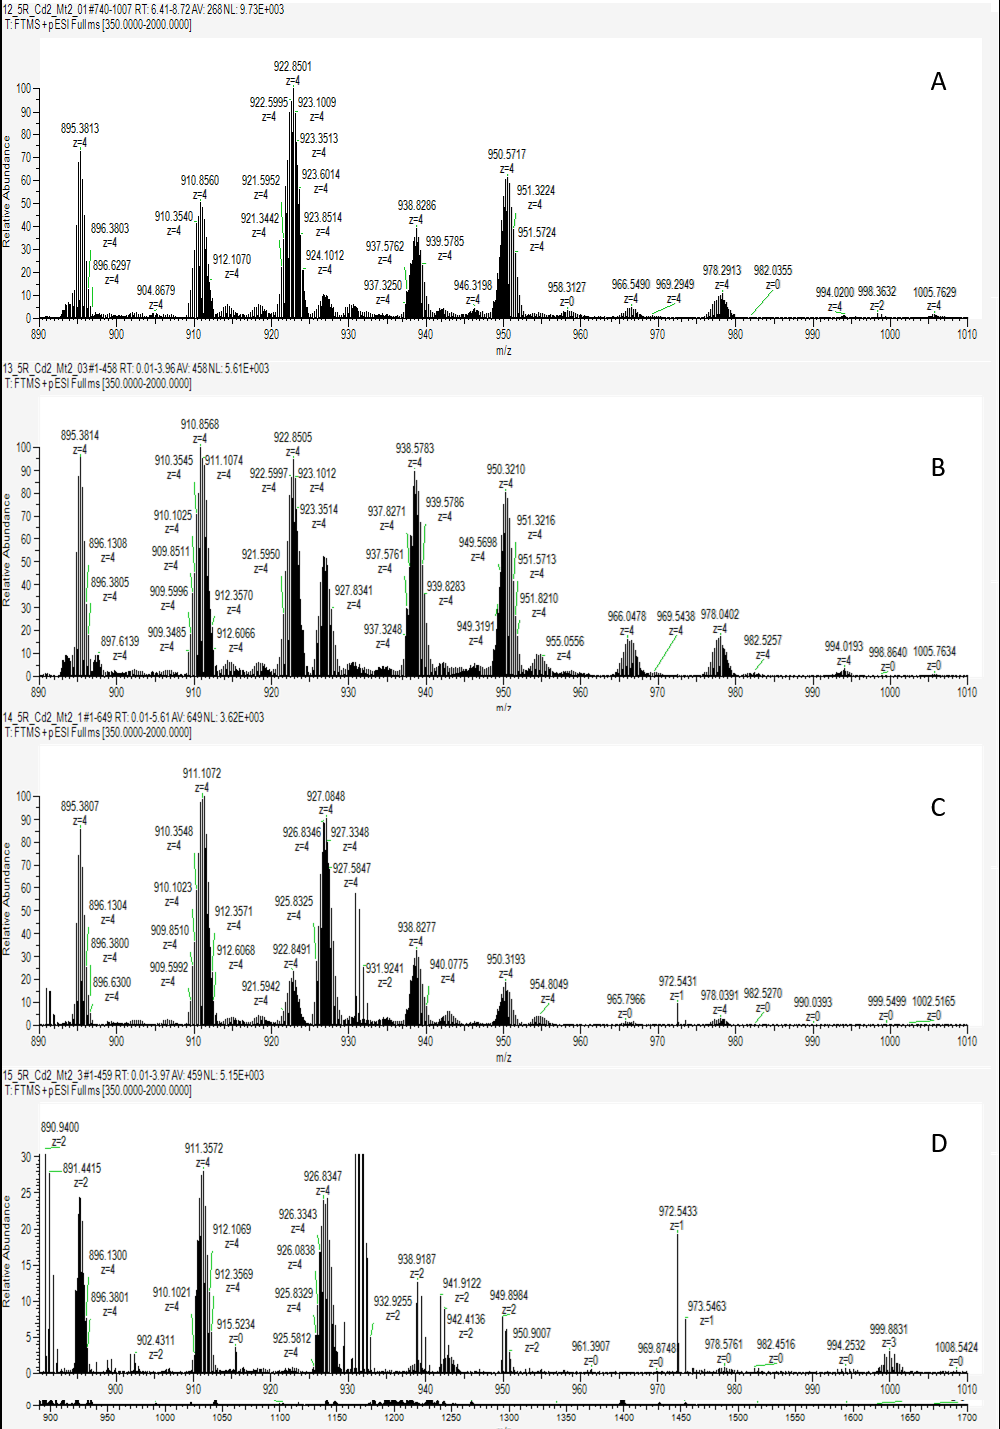


**Figure S3.** Native mass spectra of 10 μM 5R-hepcidin with 20 μM Cd(II) acetate with varying concentration of metallothionein MT2A: A) 1 μM, B) 3 μM, C) 10 μM, D) 30 μM in ammonium acetate pH 7.4 Due to high noise and differing intensities, for better clarity only fragment for 5R-hepcidin is shown, the fragment with peaks associated with MT2A is shown in Fig. S4.


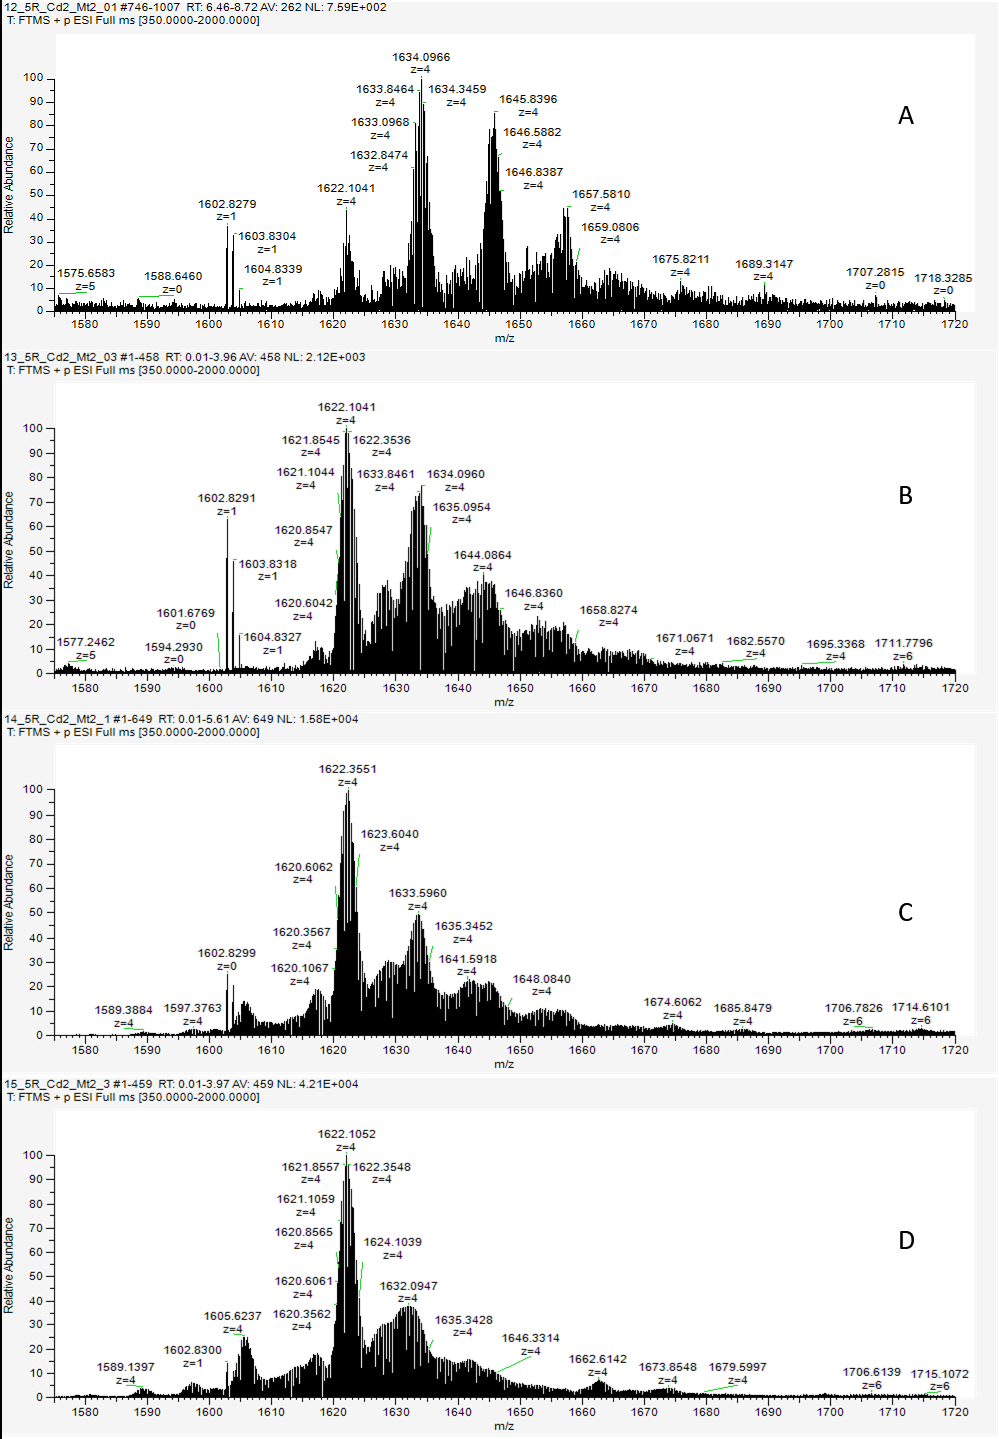


**Figure S4.** Native mass spectra of 10 μM 5R-hepcidin with 20 μM Cd(II) acetate with varying concentration of metallothionein MT2A: A) 1 μM, B) 3 μM, C) 10 μM, D) 30 μM in ammonium acetate pH 7.4 Due to high noise and differing intensities, for better clarity only peaks associated with MT2A is shown, the spectrum fragment with peaks associated with 5R-hepcidin is shown in Fig. S3.
